# Supplementary material for: Apparent Defect in Yeast Bud-Site Selection Due to a Specific Failure to Splice the Pre-mRNA of a Regulator of Cell-Type-Specific Transcription
Source: PLoS One. 2012 Oct 31;7(10):e47621. doi: 10.1371/journal.pone.0047621 (PMC3485267; doi:10.1371/journal.pone.0047621)
Supplement: Table S1 — PCR primers used in this study. (DOCX) [file pone.0047621.s001.docx]

| **Table S1.** PCR primers used in this study. | |
| --- | --- |
| **Primer** | **Sequence** |
| F1/BUD13 a | 5'-AGACTCGAATGGTGGAAGATAACAACAGGACGTTTATTACCGGATCCCCGGGTTAATTA-3' |
| R1/BUD13 a | 5'-TACACAAAGCTTTCCGCATAGTTATATATTATCTCATTTGAATTCGAGCTCGTTTAAAC-3' |
| F/BUD13-chk a | 5'-TACGATAGTGAACCTCTGCTGATTC-3' |
| 3'TRP1-chk a | 5'-GTGCTTAATCACGTATACTCACGTGCTCAA-3' |
| F1/IST3 b | 5'-ATTCTAGATCAAGAACATAGATAATATAAACAAAATAACACGGATCCCCGGGTTAATTA-3' |
| R1/IST3 b | 5'-CTATATGAATATAAGATATGCGATGAAAGAAAAAATTATGAATTCGAGCTCGTTTAAAC-3' |
| F/IST3-chk b | 5'-CGCTTATCAGAAGAGCTGAAGCAAT-3' |
| F1/PML1 c | 5'-GCATGGTGTACTTCATTTCCGACTCCATTTGCGTATAGACCGGATCCCCGGGTTAATTAA-3' |
| R1/PML1 c | 5'-AATAATTAAAACACACTGAAAGTGTGTTTCTTATATATGGGAATTCGAGCTCGTTTAAAC-3' |
| F/PML1-chk c | 5'-GAGAACGGCTGTCCGAAACCAACGT-3' |
| R/PML1-chk c | 5'-CAAAGAATTTCAAAGGGCGCTATTA-3' |
| 3'PTEF-chk a,b,c | 5'-GTATGGGCTAAATGTACGGGCGACAGTCAC-3' |
| 5'TTEF-chk c | 5'-TATTTTTTTTCGCCTCGACATCATCTGCCC-3' |
| F/PGAL1-AXL1 d | 5'-CTGGCGTTAAAAAATAGCAACTGAATAAGTTTTTTTACTGGAATTCGAGCTCGTTTAAAC-3' |
| R/PGAL1-AXL1 d | 5'-AAAACGAGACTTCATAATTAGTTACTTCTCTCAAGGACATTTTGAGATCCGGGTTTT-3' |
| F/AXL1-GFP d | 5'-GGAGCTTCCTGAACCAAACTTTTTCCGCAAGGCCGCATTTCGGATCCCCGGGTTAATTAA-3' |
| R/AXL1-GFP d | 5'-CAAAAACGTGGAAAGGCTGGAACGAGCAAAATACGGTTCAGAATTCGAGCTCGTTTAAAC-3' |
| F/MATa1-SalI e | 5'-AAAGTCGACATGGATGATATTTGTAGTATGGCGG-3' |
| R/MATa1-BamHI e | 5'-GGGATCCCTTATTTAGATCTCATACGTTTATTT-3' |
| F/PADH1-SphI f | 5'-AAAGCATGCAACTTCTTTTCTTTTTTTT-3' d |
| R/PADH1-SalI f | 5'-AAAGTCGACCATTGTATATGAGATAGTTGATTGT-3' d |
| F/ACT1-15 g | 5'-TTTACTGAATTAACAATGGATTCTG-3' |
| R/ACT1+786 g | 5'-CAGCGTAAATTGGAACGACGTGAGT-3' |
| F/ACT1+11 h | 5'-GTATGTTCTAGCGCTTGCACCATCC-3' e |
| F/RPS17A-22 e | 5'-TCTCGAGACTAGCAATAACAAAATG-3' |
| R/RPS17A+785 e | 5'-TTAAACTCTCTTTCTGTAACGTCTG-3' |
| F/RPS17A+4 h | 5'-GTATGTTAATATGGACTAAAGGAGG-3' e |
| F/DYN2 e | 5'-ATGAGCGATGAAAATAAGAGTACGC-3'f |
| R/DYN2 e | 5'-TTATGCTGTTTTGAAAACTAAAAAC-3' f |
| F/RPL7A-14 g | 5'-AAATTAAGATCACAATGGCCGCTGA-3' f |
| R/RPL7A+1232 g | 5'-TCTTGTCAATCTTAGCAATTGTAGA-3' f |

a Primers used for deletion and checking of *BUD13.*

b Primers used for deletion and checking of *IST3.*

c Primers used for deletion and checking of *PML1.*

d Primers used to construct the chromosomal *PGAL1-AXL1* and *AXL1-GFP* loci.

e Primers designed to amplify the full-length coding regions (and hence cDNAs derived from either spliced or unspliced mRNAs) of *MAT****a****1,* *RPS17A,* and *DYN2.* See Figure 4A.

f Primers used to clone the *ADH1* promoter.

g Primers corresponding to exon sequences (the forward primers include the start codons) and designed to amplify segments of *ACT1* and *RPL7A* that include their introns (and hence cDNAs derived from either spliced or unspliced mRNAs). See Figure 4A.

h Forward primers corresponding to intron sequences that should amplify only cDNAs derived from the unspliced pre-mRNAs. See Figure 4A.
